# Supplementary material
Source: PubMed Central journal article supplement (PMC7187588)
Supplement: AAC.01326-19-s0001.pdf [file AAC.01326-19-s0001.pdf]

## Supplementary material

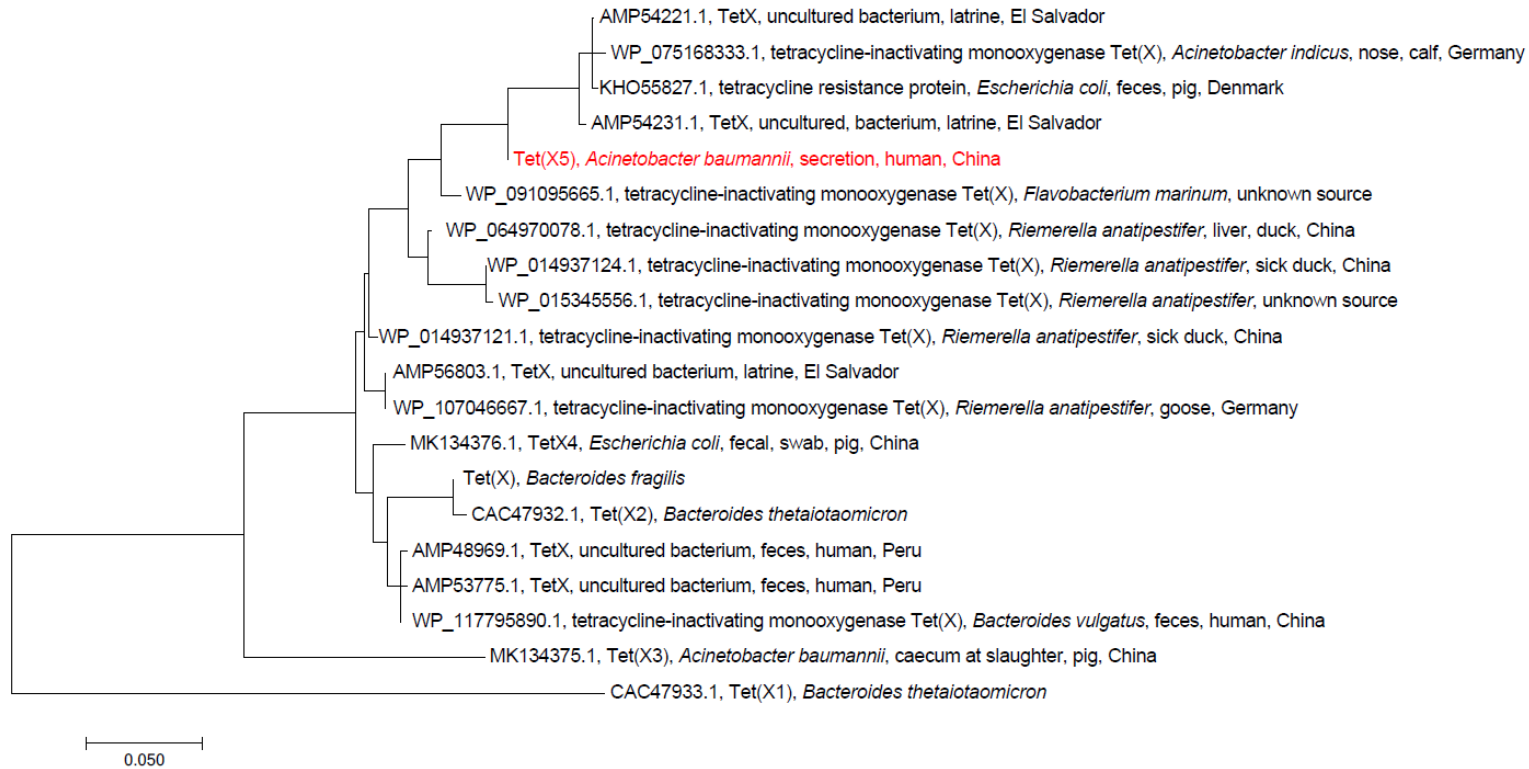

**FIG S1** Phylogenetic analysis of the Tet(X5) protein sequence. Phylogenetic tree of the deduced amino acid sequences of putative phosphoethanolamine transferases from different bacterial species. The tree was generated using MEGA 7 by Maximum likelihood method.

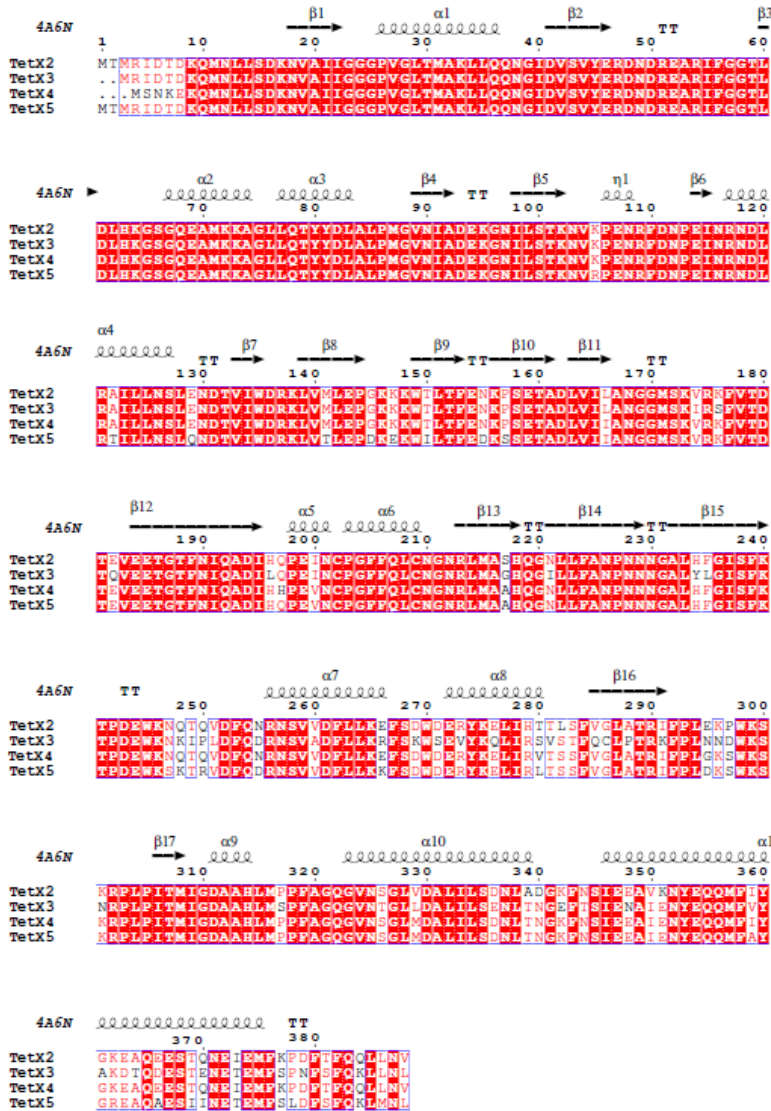

**FIG S2** BLAST alignments of amino acid sequences of four *tet(X)* variants using Clustal 2.1 and ESPrict 3.0 (<https://www.genome.jp/tools-bin/clustalw> and <http://esprict.ibcp.fr/ESPrict/cgi-bin/ESPrict.cgi>). Original Tet(X2)-tigecycline complex (PDB ID: 4A6N) served as the reference for secondary structure depiction.

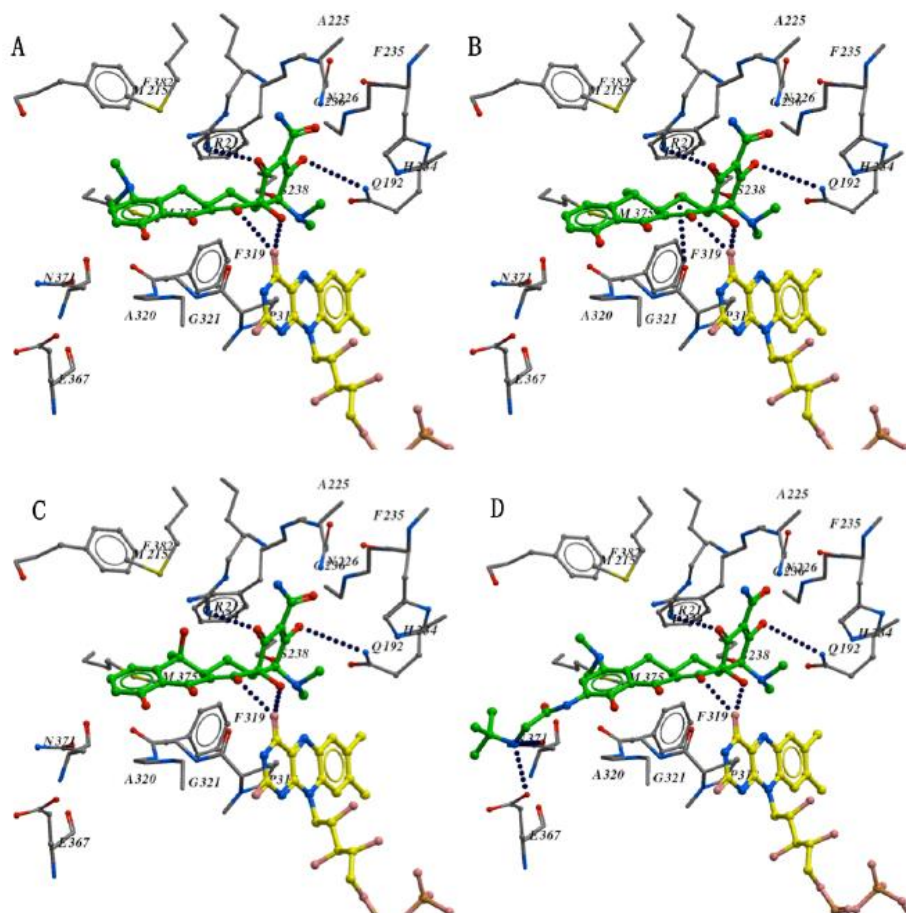

**FIG S3** Predicted binding conformations of minocycline (A), doxycycline (B), tetracycline (C) and tigecycline (D) in the substrate-binding site of the modelled Tet(X5) structure. The binding conformations suggest that the tetracycline core has an essentially identical interaction with Tet(X5). Hydrogen bonds are depicted by blue dotted lines.

**TABLE S1 Minimum inhibitory concentration (MIC) values of various antimicrobial agents against *Acinetobacter baumannii* AB17H194**

|               | MIC (mg/L) of various antimicrobials |
|---------------|--------------------------------------|
|               | AB17H194                             |
| Tetracycline  | 256                                  |
| Doxycycline   | 32                                   |
| Minocycline   | 8                                    |
| Tigecycline   | 32                                   |
| Eravacycline  | 32                                   |
| Omadacycline  | 32                                   |
| Piperacillin  | 64                                   |
| Ceftazidime   | 16                                   |
| Cefepime      | 32                                   |
| Aztreonam     | 0.5                                  |
| Imipenem      | 0.5                                  |
| Meropenem     | 1                                    |
| Gentamycin    | >256                                 |
| Amikacin      | >256                                 |
| Ciprofloxacin | 64                                   |
| Levofloxacin  | 32                                   |
| Colistin      | 0.6                                  |

**TABLE S2 Predicted binding affinity of tetracyclines to TetX5.**

|         | Doxycycline | Minocycline | Tetracycline | Tigecycline |
|---------|-------------|-------------|--------------|-------------|
| Tet(X5) | -6.9        | -7.3        | -6.5         | -8.7        |
